# Supplementary material for: High-Throughput Tissue Bioenergetics Analysis Reveals Identical Metabolic Allometric Scaling for Teleost Hearts and Whole Organisms
Source: PubMed Central journal article supplement (PMC4569437; doi:10.1371/journal.pone.0137710), 2015-09-14

**S2 Fig.** Basal oxygen consumption rate recording for *Danio rerio* heart, brain and liver tissues (Screen capture from XFe24 Extracellular Flux Analyzer), and change in OCR with injection of oligomycin followed by sodium azide.

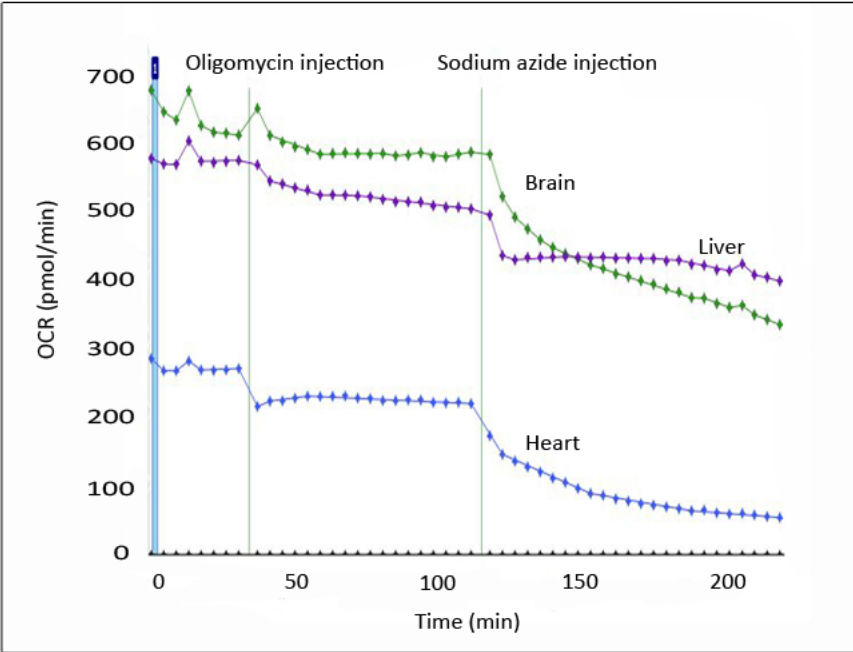

Supplement: pone.0137710.s002.pdf [file pone.0137710.s002.pdf]
