# Supplementary material for: High-Throughput Tissue Bioenergetics Analysis Reveals Identical Metabolic Allometric Scaling for Teleost Hearts and Whole Organisms
Source: PubMed Central journal article supplement (PMC4569437; doi:10.1371/journal.pone.0137710), 2015-09-14

**S3 Fig.** Log of heart and brain mass plotted against log of body mass for each individual species.

*D. rerio*

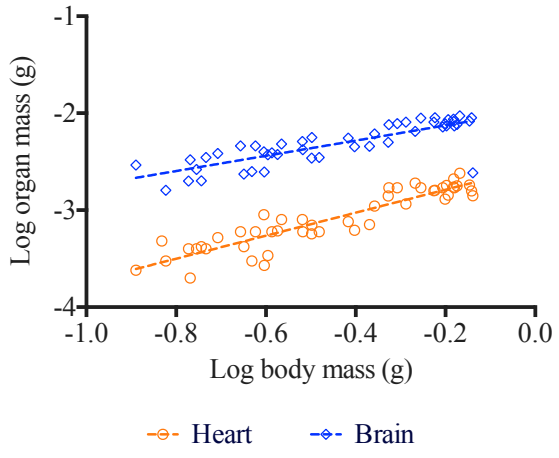

*F. heteroclitus*

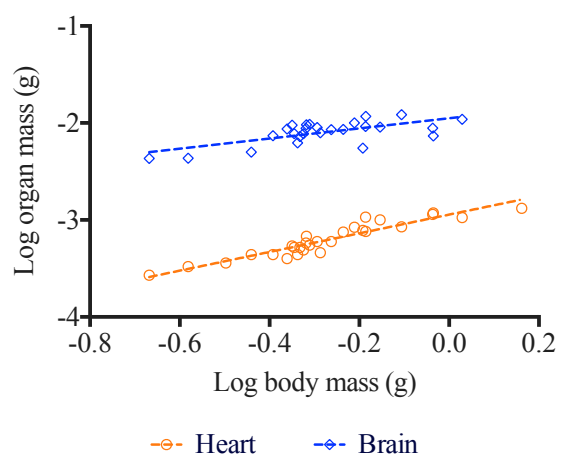

*O. latipes*

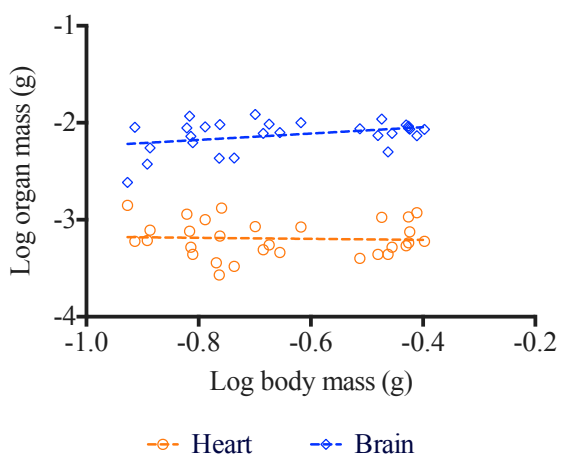

*G. holbrooki*

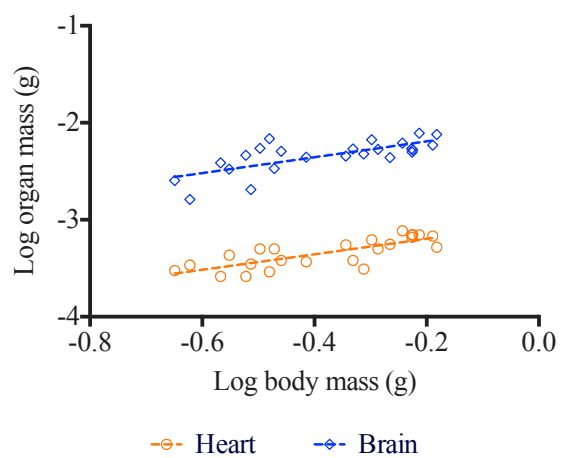

*P. promelas*

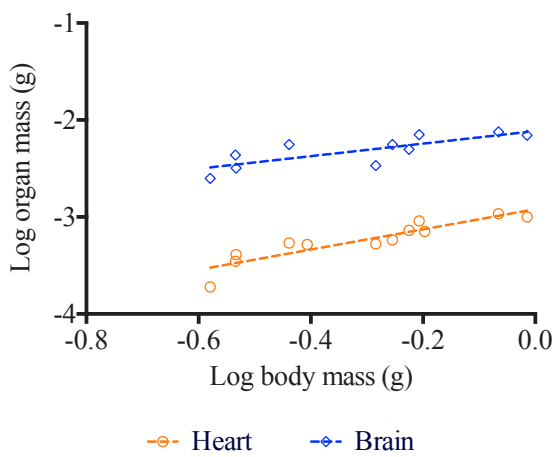

Supplement: pone.0137710.s003.pdf [file pone.0137710.s003.pdf]
