# Supplementary material for: High-Throughput Tissue Bioenergetics Analysis Reveals Identical Metabolic Allometric Scaling for Teleost Hearts and Whole Organisms
Source: PubMed Central journal article supplement (PMC4569437; doi:10.1371/journal.pone.0137710), 2015-09-14
Supplement: pone.0137710.s004.pdf [file pone.0137710.s004.pdf]

**S1 Table. Specimen information.** Mean and median of body mass, heart mass and brain mass used in the current study for each species.

|                   |        | <i>D. rerio</i>         | <i>O. latipes</i>       | <i>P. promelas</i>      | <i>F. heteroclitus</i>   | <i>G. holbrooki</i>     |
|-------------------|--------|-------------------------|-------------------------|-------------------------|--------------------------|-------------------------|
| <b>Fish (mg)</b>  | Range  | 129.00-726.30<br>(n=48) | 118.40-400.50<br>(n=30) | 263.50-967.00<br>(n=12) | 214.70-1450.70<br>(n=28) | 224.30-657.70<br>(n=25) |
|                   | Mean   | 404.99                  | 239.49                  | 530.08                  | 582.30                   | 434.00                  |
|                   | Median | 356.65                  | 203.25                  | 538.40                  | 498.60                   | 452.80                  |
| <b>Heart (mg)</b> | Range  | 0.20-2.40<br>(n=48)     | 0.17-0.84<br>(n=30)     | 0.19-1.08<br>(n=12)     | 0.27-1.32<br>(n=28)      | 0.26-0.77<br>(n=24)     |
|                   | Mean   | 1.02                    | 0.39                    | 0.63                    | 0.68                     | 0.48                    |
|                   | Median | 0.78                    | 0.35                    | 0.56                    | 0.59                     | 0.50                    |
| <b>Brain (mg)</b> | Range  | 1.60-9.40<br>(n=47)     | 1.77-5.36<br>(n=29)     | 2.50-7.54<br>(n=10)     | 4.30-12.18<br>(n=26)     | 1.62-7.81<br>(n=24)     |
|                   | Mean   | 5.41                    | 3.06                    | 5.12                    | 7.69                     | 4.89                    |
|                   | Median | 4.80                    | 2.79                    | 5.29                    | 8.63                     | 5.03                    |
