# Supplementary material for: High-Throughput Tissue Bioenergetics Analysis Reveals Identical Metabolic Allometric Scaling for Teleost Hearts and Whole Organisms
Source: PubMed Central journal article supplement (PMC4569437; doi:10.1371/journal.pone.0137710), 2015-09-14
Supplement: pone.0137710.s005.pdf [file pone.0137710.s005.pdf]

**S2 Table. Pharmacological agent information.** Different pharmacological agents used for partitioning metabolic function, the number of optimum measurement cycles, the concentrations tested, and the working concentrations for each agent, per tissue and per species.

| <b>Heart</b>           |                            |                        |                                       |                              |
|------------------------|----------------------------|------------------------|---------------------------------------|------------------------------|
| <b>Drug</b>            | <b>Measurement cycles*</b> | <b>Species</b>         | <b>Range of concentrations tested</b> | <b>Working concentration</b> |
| Oligomycin             | 8-10                       | <i>D. rerio</i>        | 1-150 $\mu$ M (up to 1% DMSO)         | 10 $\mu$ M in 1% DMSO        |
|                        |                            | <i>F. heteroclitus</i> | 5-150 $\mu$ M (up to 1% DMSO)         | 15-25 $\mu$ M in 1% DMSO     |
|                        |                            | <i>P. promelas</i>     | 1-20 $\mu$ M (up to 2% DMSO)          | Not found                    |
|                        |                            | <i>O. latipes</i>      | 1-20 $\mu$ M                          | Not found                    |
| FCCP                   | 6-8                        | <i>D. rerio</i>        | 0.5-150 $\mu$ M (up to 1% DMSO)       | 2 $\mu$ M in 1% DMSO         |
|                        |                            | <i>F. heteroclitus</i> | 2-150 $\mu$ M                         | 5 $\mu$ M                    |
|                        |                            | <i>P. promelas</i>     | 2-20 $\mu$ M (up to 2% DMSO)          | Not found                    |
|                        |                            | <i>O. latipes</i>      | 2-30 $\mu$ M (up to 1% DMSO)          | Not found                    |
| Sodium azide           | 25+                        | <i>D. rerio</i>        | 1-3000 mM (up to 1% DMSO)             | 100 mM                       |
|                        |                            | <i>F. heteroclitus</i> | 10 mM -100 mM                         | 30 mM                        |
|                        |                            | <i>P. promelas</i>     | 10-30 mM                              | Not found                    |
|                        |                            | <i>O. latipes</i>      | 100 mM                                | Not found                    |
| Antimycin A + rotenone | 25+                        | <i>D. rerio</i>        | 20-50 $\mu$ M + 20-50 $\mu$ M         | 44 $\mu$ M + 44 $\mu$ M      |
|                        |                            | <i>F. heteroclitus</i> | 20-50 $\mu$ M + 20-50 $\mu$ M         | 44 $\mu$ M + 44 $\mu$ M      |
| Rotenone               | Not found                  | <i>D. rerio</i>        | 2-60 $\mu$ M                          | Not found                    |
| DCCD                   | Not found                  | <i>D. rerio</i>        | 2-25 $\mu$ M (up to 1% DMSO)          | Not found                    |
| DMSO control           | Not found                  | <i>D. rerio</i>        | up to 2%                              | No effect                    |
|                        |                            | <i>P. promelas</i>     | up to 2%                              | No effect                    |
| <b>Brain</b>           |                            |                        |                                       |                              |
| <b>Drug</b>            | <b>Measurement cycles</b>  | <b>Species</b>         | <b>Range of concentrations tested</b> | <b>Final concentration</b>   |
| Oligomycin             | 8-10                       | <i>D. rerio</i>        | 1-100 $\mu$ M (up to 1% DMSO)         | Not found                    |
|                        |                            | <i>F. heteroclitus</i> | 5-150 $\mu$ M (up to 1% DMSO)         | Not found                    |
| FCCP                   | 6-8                        | <i>D. rerio</i>        | 2-150 $\mu$ M (up to 1% DMSO)         | Not found                    |
|                        |                            | <i>F. heteroclitus</i> | 2-150 $\mu$ M                         | Not found                    |
| Sodium azide           | 25+                        | <i>D. rerio</i>        | 10-100 mM (up to 1% DMSO)             | Not found                    |
|                        |                            | <i>F. heteroclitus</i> | 20-100 mM                             | Not found                    |
| Antimycin + rotenone   | 25+                        | <i>D. rerio</i>        | 50 $\mu$ M + 50 $\mu$ M               | Not found                    |
|                        |                            | <i>F. heteroclitus</i> | 25 mM + 25 mM                         | Not found                    |
| Rotenone               | Not found                  | <i>D. rerio</i>        | 50-60 $\mu$ M                         | Not found                    |
| DCCD                   | Not found                  | <i>D. rerio</i>        | 2-25 $\mu$ M (1% DMSO)                | Not found                    |
| DMSO control           | Not found                  | <i>D. rerio</i>        | up to 2%                              | No effect                    |

| <b>Liver</b>           |                           |                        |                                       |                            |
|------------------------|---------------------------|------------------------|---------------------------------------|----------------------------|
| <b>Drug</b>            | <b>Measurement cycles</b> | <b>Species</b>         | <b>Range of concentrations tested</b> | <b>Final concentration</b> |
| Oligomycin             | 8-10                      | <i>D. rerio</i>        | 10-20 $\mu$ M                         | Not found                  |
|                        |                           | <i>F. heteroclitus</i> | 15-30 $\mu$ M                         | Not found                  |
| FCCP                   | 6-8                       | <i>D. rerio</i>        | 3-5 $\mu$ M                           | Not found                  |
|                        |                           | <i>F. heteroclitus</i> | 2 $\mu$ M                             | Not found                  |
| Sodium azide           | 25+                       | <i>D. rerio</i>        | 10 mM                                 | Not found                  |
|                        |                           | <i>F. heteroclitus</i> | 20-30 mM                              | Not found                  |
| <b>Skeletal Muscle</b> |                           |                        |                                       |                            |
| <b>Drug</b>            | <b>Measurement cycles</b> | <b>Species</b>         | <b>Range of concentrations tested</b> | <b>Final concentration</b> |
| Oligomycin             | 8-10                      | <i>D. rerio</i>        | 10 $\mu$ M                            | Not found                  |
| FCCP                   | 6-8                       | <i>D. rerio</i>        | 2-5 $\mu$ M                           | Not found                  |
| Sodium azide           | 25+                       | <i>D. rerio</i>        | 10 mM                                 | Not found                  |

Note: \* Measurement cycle consisted of 1 min mix, 1 min wait, 2 min measure
