# Supplementary material for: High-Throughput Tissue Bioenergetics Analysis Reveals Identical Metabolic Allometric Scaling for Teleost Hearts and Whole Organisms
Source: PubMed Central journal article supplement (PMC4569437; doi:10.1371/journal.pone.0137710), 2015-09-14
Supplement: pone.0137710.s006.pdf [file pone.0137710.s006.pdf]

**S3 Table. Detailed statistics on regression analyses.** Slopes and Y intercepts for log oxygen consumption rates of whole organism, hearts and brains plotted against log body mass for all five species combined and for each individual species.

|                                 | All five species  |               |                | <i>Danio rerio</i> |               |                | <i>Fundulus heteroclitus</i> |               |                | <i>Gambusia holbrooki</i> |               |                | <i>Oryzias latipes</i> |               |                | <i>Pimephales promelas</i> |              |               |
|---------------------------------|-------------------|---------------|----------------|--------------------|---------------|----------------|------------------------------|---------------|----------------|---------------------------|---------------|----------------|------------------------|---------------|----------------|----------------------------|--------------|---------------|
|                                 | Org. <sup>b</sup> | Heart         | Brain          | Org.               | Heart         | Brain          | Org.                         | Heart         | Brain          | Org.                      | Heart         | Brain          | Org.                   | Heart         | Brain          | Org.                       | Heart        | Brain         |
| Slope ( <i>b</i> )              | <b>0.5218</b>     | <b>0.5504</b> | <b>-0.0886</b> | <b>0.5968</b>      | <b>0.5877</b> | <b>-0.0277</b> | <b>0.7792</b>                | <b>0.7084</b> | <b>-0.1607</b> | <b>0.5268</b>             | <b>0.5033</b> | <b>0.08341</b> | <b>0.4099</b>          | <b>0.3713</b> | <b>0.01938</b> | <b>1.072</b>               | <b>1.040</b> | <b>0.1320</b> |
| Y Intercept                     | -0.4596           | -3.079        | -2.962         | -0.4549            | -2.901        | -2.920         | -0.4105                      | -3.130        | -3.035         | -0.4790                   | -3.241        | -2.858         | -0.4714                | -3.272        | -2.874         | -0.2666                    | -2.919       | -2.849        |
| <b>Std. Error</b>               |                   |               |                |                    |               |                |                              |               |                |                           |               |                |                        |               |                |                            |              |               |
| Slope                           | 0.05091           | 0.06466       | 0.03831        | 0.1006             | 0.08579       | 0.04394        | 0.1185                       | 0.1774        | 0.1592         | 0.1745                    | 0.1977        | 0.06331        | 0.1725                 | 0.1282        | 0.04877        | 0.1104                     | 0.1483       | 0.07492       |
| Y Intercept                     | 0.02454           | 0.03181       | 0.01876        | 0.04986            | 0.04306       | 0.02234        | 0.03807                      | 0.05699       | 0.05113        | 0.07211                   | 0.08019       | 0.02479        | 0.1157                 | 0.08710       | 0.03297        | 0.03963                    | 0.05323      | 0.02744       |
| <b>95% Confidence Intervals</b> |                   |               |                |                    |               |                |                              |               |                |                           |               |                |                        |               |                |                            |              |               |
| Slope                           | 0.4220            | 0.4236        | -0.1637        | 0.3939             | 0.4149        | -0.1164        | -0.4888                      | -3.247        | -3.141         | 0.1659                    | 0.09321       | -0.0482        | 0.05466                | 0.1087        | -0.0806        | 0.8256                     | 0.7097       | -0.0407       |
|                                 | to                | to            | to -           | to                 | to            | to             | to                           | to            | to             | to                        | to            | to             | to                     | to            | to             | to                         | to           | to            |
|                                 | 0.6216            | 0.6771        | 0.01353        | 0.7996             | 0.7606        | 0.06087        | -0.3322                      | -3.013        | -2.930         | 0.8878                    | 0.9133        | 0.2151         | 0.7652                 | 0.6339        | 0.1195         | 1.318                      | 1.371        | 0.3048        |
| Y Intercept                     | -0.5077           | -3.141        | -2.999         | -0.5554            | -2.988        | -2.96          | 0.5356                       | 0.3436        | -0.4880        | -0.6282                   | -3.408        | -2.909         | -0.7098                | -3.450        | -2.941         | -0.3549                    | -3.038       | -2.912        |
|                                 | to                | to            | to             | to                 | to            | to             | to                           | to            | to             | to                        | to            | to             | to                     | to            | to             | to                         | to           | to            |
|                                 | -0.4116           | -3.016        | -2.925         | -0.3544            | -2.814        | -2.87          | 1.0230                       | 1.073         | 0.1665         | -0.329                    | -3.075        | -2.806         | -0.2330                | -3.093        | -2.806         | -0.1783                    | -2.801       | -2.785        |
| <b>Goodness of Fit</b>          |                   |               |                |                    |               |                |                              |               |                |                           |               |                |                        |               |                |                            |              |               |
| R <sup>2</sup>                  | 0.4358            | 0.3426        | 0.03786        | 0.4387             | 0.5050        | 0.00921        | 0.6245                       | 0.3801        | 0.03775        | 0.2839                    | 0.2275        | 0.07635        | 0.1843                 | 0.2305        | 0.00588        | 0.9040                     | 0.8310       | 0.2796        |
| <b>Sample size<sup>a</sup></b>  |                   |               |                |                    |               |                |                              |               |                |                           |               |                |                        |               |                |                            |              |               |
| Analyzed                        | 138               | 141           | 138            | 47                 | 48            | 45             | 28                           | 28            | 28             | 25                        | 24            | 23             | 27                     | 30            | 29             | 12                         | 12           | 10            |
| Outliers                        | 5                 | 1             | 1              | 1                  | 0             | 3              | 0                            | 0             | 0              | 0                         | 1             | 2              | 3                      | 0             | 1              | 0                          | 0            | 0             |

Note: <sup>a</sup>Total number of fish tested is obtained by combining number of samples in analyzed and outliers rows. <sup>b</sup>Org. -Whole organism.
