# Supplementary material for: High-Throughput Tissue Bioenergetics Analysis Reveals Identical Metabolic Allometric Scaling for Teleost Hearts and Whole Organisms
Source: PubMed Central journal article supplement (PMC4569437; doi:10.1371/journal.pone.0137710), 2015-09-14
Supplement: pone.0137710.s007.pdf [file pone.0137710.s007.pdf]

**S4 Table. Heart and brain scaling exponent comparison.** Comparison of exponent  $b$  between log of heart and brain oxygen consumption rates (OCR) with log of whole organismal metabolic rates (RMO<sub>2</sub>).  $P$  and  $F$  values are calculated by testing if the slope of the curve log of tissue OCR:RMO<sub>2</sub> plotted against log body mass is equal to zero.

| Hearts vs Whole organism        | All five species | <i>Danio rerio</i> | <i>Fundulus heteroclitus</i> | <i>Gambusia holbrooki</i> | <i>Oryzias latipes</i> | <i>Pimephales promelas</i> |
|---------------------------------|------------------|--------------------|------------------------------|---------------------------|------------------------|----------------------------|
| <b><i>P value</i></b>           | 0.1424           | 0.4215             | 0.7667                       | 0.2155                    | 0.3853                 | 0.0511                     |
| <b><i>F (DFn, DFd)</i></b>      | 2.176 (1,141)    | 0.6577 (1,46)      | 0.08992 (1,26)               | 1.6222 (1,23)             | 0.7779 (1,28)          | 4.909 (1,10)               |
| <b>Brains vs Whole organism</b> |                  |                    |                              |                           |                        |                            |
| <b><i>P value</i></b>           | <0.0001          | <0.0001            | <0.0001                      | 0.1502                    | 0.0204                 | <0.0001                    |
| <b><i>F (DFn, DFd)</i></b>      | 47.27 (1,139)    | 27.07 (1,46)       | 23.42 (1,26)                 | 2.216 (1,23)              | 6.048 (1,28)           | 45.76 (1,8)                |
