# Supplementary material for: High-Throughput Tissue Bioenergetics Analysis Reveals Identical Metabolic Allometric Scaling for Teleost Hearts and Whole Organisms
Source: PubMed Central journal article supplement (PMC4569437; doi:10.1371/journal.pone.0137710), 2015-09-14
Supplement: pone.0137710.s008.pdf [file pone.0137710.s008.pdf]

**S5 Table. Detailed statistics for heart OCR versus heart mass.** Slopes and Y intercepts for log oxygen consumption rates of hearts plotted against log heart mass for all five species combined and for *Danio rerio* and *Fundulus heteroclitus*.

|                                 | All five species    | <i>Danio rerio</i>  | <i>Fundulus heteroclitus</i> |
|---------------------------------|---------------------|---------------------|------------------------------|
| Slope ( <i>b</i> )              | 0.5196              | 0.4722              | 0.6588                       |
| Y Intercept                     | -1.675              | -1.709              | -1.210                       |
| <b>Std. Error</b>               |                     |                     |                              |
| Slope                           | 0.06771             | 0.06381             | 0.1781                       |
| Y Intercept                     | 0.2161              | 0.1976              | 0.5718                       |
| <b>95% Confidence Intervals</b> |                     |                     |                              |
| Slope                           | 0.3869 to<br>0.6523 | 0.3437 to<br>0.6008 | 0.2926 to<br>1.025           |
| Y Intercept                     | -2.099 to<br>-1.252 | -2.107 to<br>-1.311 | -2.385 to<br>-0.034          |
| <b>Goodness of Fit</b>          |                     |                     |                              |
| R <sup>2</sup>                  | 0.3151              | 0.5435              | 0.3448                       |
| <b>Sample size<sup>a</sup></b>  |                     |                     |                              |
| Analyzed                        | 130                 | 48                  | 28                           |
| Outliers                        | 0                   | 0                   | 0                            |

Note: <sup>a</sup>Total number of fish tested is obtained by combining number of samples in analyzed and outliers rows.
